# Supplementary material for: Ancient Out-of-Africa Mitochondrial DNA Variants Associate with Distinct Mitochondrial Gene Expression Patterns
Source: PLoS Genet. 2016 Nov 3;12(11):e1006407. doi: 10.1371/journal.pgen.1006407 (PMC5094714; doi:10.1371/journal.pgen.1006407)
Supplement: S4 Table — Number of individuals per SNP is listed. Information indicated in columns E-H is available only for SNPs that passed the p-value cutoff after Bonferroni correction (5.84e-5) in the two tested groups. (XLSX) [file pgen.1006407.s009.xlsx]

## Sheet: Sheet1
SNP	Gene	t-stat	p-value	Group Size	Allele	Group Content	Additional Individuals
5460	12S	-6.47331	6.34619e-09	4	A	L0a2a	L3b1a5a
16304	ND2	-4.58184	1.60795e-05	1	C	L3e2b2
5460	16S	-4.31563	4.36946e-05	4	A	L0a2a	L3b1a5a
73	12S	-4.05673	0.00011189
73	16S	-3.96084	0.000157166
16519	ND3	3.81147	0.000264287
16519	16S	3.60247	0.000535902
14905	ND5	-3.59405	0.000551111
15301	ATP6	-3.33458	0.00127868
16519	CO3	3.33296	0.00128526
150	ND5	3.29881	0.00143149
1888	ND3	-3.05592	0.00301737
13708	CYB	-2.92266	0.00447078
16519	ND4	2.90515	0.00470374
10819	ND5	2.8949	0.00484537
16183	ND5	2.89021	0.00491132
185	12S	-2.87287	0.00516291
185	16S	-2.85545	0.00542754
150	ATP6	2.84901	0.00552835
3010	ND3	-2.78355	0.00665657
2617	12S	2.77936	0.00673554
16256	CO2	2.77178	0.00688054
14905	ND6	-2.76444	0.00702356
150	ND6	2.74415	0.00743344
2617	16S	2.70585	0.00826723
16183	ND6	2.65346	0.00954554
16172	16S	-2.64473	0.00977536
6221	CO2	-2.62806	0.010228
769	CO2	2.60163	0.0109845
3594	CO2	-2.60163	0.0109845
4104	CO2	-2.60163	0.0109845
7256	CO2	-2.60163	0.0109845
13650	CO2	-2.60163	0.0109845
5460	ATP8	2.57446	0.0118149
11944	ND3	-2.54757	0.0126918
73	ATP8	2.53651	0.0130691
15301	CO2	-2.51961	0.0136655
16519	ATP6	2.51955	0.0136677
16519	ND4L	2.5193	0.0136766
14182	CO2	-2.51056	0.0139949
15301	ND3	-2.47542	0.0153418
15301	ND4	-2.44869	0.0164436
16189	ATP6	2.44868	0.0164437
16126	16S	2.42185	0.0176198
73	ATP6	2.40921	0.0181996
150	CYB	2.38792	0.0192147
150	ND4	2.3835	0.0194313
16183	ND4L	2.37347	0.0199318
16519	ND6	2.3546	0.020904
195	12S	2.3361	0.0218978
2416	ND3	-2.33334	0.0220496
8206	ND3	-2.33334	0.0220496
10115	ND3	-2.33334	0.0220496
13590	ND3	-2.33334	0.0220496
16390	ND3	-2.33334	0.0220496
2617	ND1	-2.2894	0.0245955
16311	ATP6	2.25009	0.0270891
15301	CYB	-2.24612	0.0273526
9477	ND5	2.2331	0.0282337
10819	ND6	2.22384	0.0288757
6221	ND5	2.21481	0.0295138
1888	ND6	-2.19174	0.0311999
150	CO1	2.19091	0.0312618
16311	ND4	2.16526	0.0332382
5046	CO2	2.16365	0.0333663
16270	CO2	-2.16365	0.0333663
16129	16S	-2.15458	0.0340933
9221	ND3	2.12101	0.036905
16126	CO2	2.11319	0.0375882
14182	CO3	-2.07677	0.0409159
16126	ND4	2.07477	0.0411058
16311	CO2	2.07375	0.0412031
9477	ND4L	2.07225	0.0413455
185	CO2	-2.06396	0.0421453
16519	CO1	2.05823	0.0427054
5046	ATP6	2.04395	0.0441296
16270	ATP6	-2.04395	0.0441296
6221	ND4L	2.0384	0.0446935
1888	CO3	-2.03238	0.0453129
14905	ND4L	-2.02878	0.0456862
5460	ATP6	2.02797	0.0457707
16278	ND5	-2.01429	0.0472176
16256	CO3	2.01409	0.0472386
15301	ND6	-2.00282	0.0484605
1018	CO2	1.98113	0.0508879
185	ND6	-1.97377	0.0517349
14905	ND4	-1.97302	0.0518216
16189	CYB	1.96933	0.0522519
16270	16S	-1.96045	0.0532984
5046	16S	1.96045	0.0532984
2617	ND2	-1.95462	0.0539948
195	ND4L	-1.95232	0.0542712
150	ND4L	1.95115	0.054413
16126	ATP6	1.94952	0.0546107
16189	CO3	1.94693	0.0549257
3010	ND1	-1.93455	0.0564524
5046	ND4	1.93231	0.0567325
16270	ND4	-1.93231	0.0567325
15301	ND5	-1.91906	0.058414
10819	CO2	1.90799	0.0598503
16519	ND1	1.90277	0.0605381
16172	12S	-1.90229	0.0606011
189	ND6	-1.89513	0.0615566
3010	CO3	-1.88917	0.062361
16311	ND3	1.88606	0.0627845
189	ND5	-1.8821	0.0633266
16311	CYB	1.88163	0.0633919
709	CO2	1.88	0.0636162
150	ND2	1.87794	0.0639017
16519	CYB	1.87496	0.0643151
195	16S	1.86578	0.0656043
16172	ND6	-1.85745	0.0667931
13105	ND3	-1.85177	0.0676152
10819	ND4L	1.84097	0.0691987
16172	ND5	-1.83129	0.0706459
16189	ND3	1.82397	0.0717552
16304	ATP8	-1.81758	0.0727369
16256	ATP6	1.80896	0.0740776
14905	ND2	-1.79396	0.0764608
16126	ND6	1.79126	0.0768969
16189	CO2	1.78855	0.0773368
16362	CO2	-1.77598	0.0794004
16311	ND5	1.76724	0.0808645
9221	ND4	1.75424	0.0830801
3010	CYB	-1.75176	0.0835087
13105	ND4L	-1.7483	0.0841091
73	ND3	1.74753	0.0842435
14182	ND3	-1.74484	0.0847143
9477	ND4	1.74373	0.0849093
11914	16S	-1.73777	0.0859594
9477	ND3	-1.73573	0.0863231
15301	ND1	-1.72495	0.0882584
195	CO2	1.71864	0.089408
16304	ATP6	-1.70907	0.0911748
185	ND4	-1.70828	0.0913223
15301	ND4L	-1.70581	0.091784
16519	CO2	1.69548	0.0937335
5460	ND3	1.69066	0.0946536
10819	ND4	1.68855	0.0950599
152	CO2	1.68568	0.095614
15301	CO3	-1.68097	0.0965285
709	ND5	1.6803	0.0966592
4216	CO2	1.67657	0.0973891
13105	ND5	-1.67565	0.0975712
8206	ND4	-1.67161	0.0983675
13590	ND4	-1.67161	0.0983675
16390	ND4	-1.67161	0.0983675
2416	ND4	-1.67161	0.0983675
10115	ND4	-1.67161	0.0983675
195	ND5	-1.66946	0.0987933
16183	ND2	1.66453	0.0997774
204	ND4	-1.66444	0.0997953
13105	12S	1.6591	0.10087
2617	CO2	-1.65854	0.100983
150	ATP8	1.65553	0.101594
185	CO3	-1.6482	0.103092
16519	ATP8	1.64109	0.104563
2617	ATP8	-1.63954	0.104885
16256	ND4	1.63774	0.105261
15301	ATP8	-1.6359	0.105648
709	ND4	1.61689	0.109696
3010	ND2	-1.60941	0.111324
10398	CO1	1.60805	0.111621
4216	ND4	1.60314	0.112702
16270	CYB	-1.59566	0.114365
5046	CYB	1.59566	0.114365
16126	ND3	1.58006	0.117897
11914	CO2	1.57837	0.118285
709	ATP6	1.57783	0.118409
14905	ATP6	-1.57697	0.118608
10819	ND2	1.56397	0.121629
14182	ND1	-1.55323	0.124172
16270	ND3	-1.55322	0.124176
5046	ND3	1.55322	0.124176
150	CO2	1.54931	0.125112
73	CYB	1.54024	0.127307
16270	ND6	-1.53546	0.128473
5046	ND6	1.53546	0.128473
5460	ND4L	1.53282	0.129124
15301	ND2	-1.53193	0.129341
14905	CO1	-1.52436	0.13122
5046	ND5	1.51557	0.133428
16270	ND5	-1.51557	0.133428
14905	CO2	-1.51489	0.133598
16311	ND6	1.50984	0.134883
73	ND4L	1.50626	0.135796
189	ND4	-1.50436	0.136284
16129	12S	-1.5033	0.136558
4216	ND5	1.50299	0.136638
13708	ND2	-1.50268	0.136716
185	ND5	-1.49783	0.137972
16126	CYB	1.49775	0.137992
16304	CO2	-1.4954	0.138602
73	CO2	1.49299	0.139232
16256	CYB	1.48646	0.140946
769	ATP6	1.48427	0.141526
3594	ATP6	-1.48427	0.141526
4104	ATP6	-1.48427	0.141526
7256	ATP6	-1.48427	0.141526
13650	ATP6	-1.48427	0.141526
146	ND3	-1.48049	0.14253
11944	ND4	-1.47644	0.14361
13105	ATP8	-1.47085	0.145112
16311	ND4L	1.46865	0.145709
16183	ATP8	1.46142	0.147675
16278	ND3	1.45916	0.148296
16304	ND1	-1.45733	0.1488
2352	ND5	-1.45259	0.150107
16311	CO3	1.44966	0.150921
310	ND4L	-1.44764	0.151486
10819	ATP6	1.441	0.153347
2416	CYB	-1.43998	0.153634
10115	CYB	-1.43998	0.153634
8206	CYB	-1.43998	0.153634
13590	CYB	-1.43998	0.153634
16390	CYB	-1.43998	0.153634
16362	ND5	1.43068	0.156277
14905	ND1	-1.4256	0.157735
2617	ATP6	-1.41502	0.160804
14905	CYB	-1.40521	0.163692
16126	ND5	1.4052	0.163694
146	CO2	1.40466	0.163853
204	ND5	-1.40443	0.163923
182	CO2	-1.40209	0.164617
185	CYB	-1.39833	0.16574
16304	CYB	-1.39134	0.167839
2352	16S	1.39051	0.168091
3010	ATP6	-1.3904	0.168126
10398	ND6	1.38821	0.168788
709	16S	1.37922	0.171531
2352	ND3	1.37807	0.171884
14182	ND2	-1.37796	0.17192
11914	ATP6	1.37423	0.17307
5460	CYB	1.37322	0.173383
2617	CO3	-1.37012	0.174343
16183	ND1	1.36411	0.176221
10819	CO1	1.36258	0.1767
16172	ND2	-1.36144	0.177059
73	ND1	1.35462	0.179216
204	CO1	-1.3531	0.179699
2617	CYB	-1.35131	0.180269
13105	ATP6	-1.35106	0.180347
9477	CO1	1.34873	0.181093
3010	ND4	-1.34653	0.181797
4216	12S	1.34275	0.183014
16278	12S	-1.33747	0.184721
16311	ND1	1.33693	0.184899
10398	16S	-1.33574	0.185286
195	ND6	-1.33407	0.18583
16183	CO2	1.33305	0.186164
310	ND5	-1.3091	0.194113
11944	ND4L	-1.30843	0.194339
13708	ND5	-1.30793	0.194509
185	ATP6	-1.3076	0.194618
189	ND4L	-1.2957	0.198671
185	CO1	-1.28857	0.201129
16304	ND6	-1.28612	0.201976
9221	CYB	1.27396	0.206235
6221	ND6	1.27251	0.206745
73	ND4	1.26918	0.207925
185	ND2	-1.26655	0.208861
14182	CYB	-1.26144	0.210683
16278	16S	-1.2566	0.212425
10819	CYB	1.2557	0.212747
5460	ND1	1.24891	0.215208
4216	ND6	1.24415	0.216947
14182	ATP6	-1.23485	0.22037
10819	ND1	1.22649	0.223484
1888	ATP6	-1.22578	0.223749
16304	ND3	-1.22434	0.224287
3010	CO2	-1.22265	0.224923
16126	12S	1.22259	0.224945
16256	ND3	1.22223	0.225081
13105	ND6	-1.21961	0.226069
13105	ND4	-1.21199	0.228957
189	ND2	-1.20087	0.233216
16126	CO3	1.19961	0.233703
13105	CYB	-1.19524	0.235399
10398	ND4	1.19198	0.236666
16362	CO3	-1.19098	0.237056
5460	ND4	1.18154	0.240762
310	16S	-1.16203	0.248555
204	ND6	-1.16104	0.248954
16519	ND5	1.15496	0.251419
182	12S	-1.15442	0.251641
16519	ND2	1.15367	0.251949
5046	ND2	1.14866	0.253996
16270	ND2	-1.14866	0.253996
16126	ND2	1.14678	0.254769
1888	CO1	-1.14378	0.256002
16304	ND4L	-1.1407	0.257274
204	ATP6	-1.13913	0.257927
3010	ND4L	-1.13784	0.258461
182	16S	-1.13349	0.260274
150	ND1	1.12915	0.262088
709	CYB	1.12853	0.262348
2416	ND4L	-1.12747	0.262794
8206	ND4L	-1.12747	0.262794
10115	ND4L	-1.12747	0.262794
13590	ND4L	-1.12747	0.262794
16390	ND4L	-1.12747	0.262794
11914	CO1	1.1247	0.263957
146	12S	1.12464	0.263984
5460	ND6	1.11828	0.266672
4216	ND3	1.11564	0.267796
195	ND4	-1.11073	0.269894
15301	CO1	-1.1072	0.271408
3594	ATP8	-1.10648	0.271714
7256	ATP8	-1.10648	0.271714
13650	ATP8	-1.10648	0.271714
4104	ATP8	-1.10648	0.271714
769	ATP8	1.10648	0.271714
16126	ND4L	1.10157	0.273833
2352	12S	1.09991	0.27455
9221	ND6	1.09983	0.274586
16270	CO3	-1.09703	0.2758
5046	CO3	1.09703	0.2758
189	ATP6	-1.09563	0.276409
204	CYB	-1.09499	0.27669
1018	ATP6	1.09459	0.276861
16223	ND3	1.0943	0.27699
2617	ND3	-1.09335	0.277402
10398	CO3	1.09097	0.278441
150	12S	-1.08826	0.279628
14182	CO1	-1.08697	0.280197
4216	ND2	1.08016	0.283201
5046	12S	1.07894	0.283741
16270	12S	-1.07894	0.283741
13708	ATP8	1.07892	0.283748
1888	ND2	-1.0773	0.284469
5460	ND5	1.07562	0.285214
16189	ND4	1.07357	0.286128
16189	ND2	1.07173	0.28695
13708	ATP6	-1.07051	0.287491
73	CO3	1.07007	0.287688
16183	ATP6	1.06994	0.28775
10398	ATP6	1.06567	0.289663
1888	CYB	-1.06445	0.290213
204	12S	1.05959	0.292406
2352	ND4L	-1.05751	0.293348
9221	ND5	1.05051	0.296533
16256	12S	1.04551	0.298821
709	ND4L	1.04447	0.299302
6221	CO3	-1.04409	0.299473
14182	ND4	-1.04068	0.301048
13105	ND2	-1.04005	0.301335
4216	ATP6	1.03698	0.302755
8206	ND5	-1.0358	0.303305
13590	ND5	-1.0358	0.303305
16390	ND5	-1.0358	0.303305
2416	ND5	-1.0358	0.303305
10115	ND5	-1.0358	0.303305
16311	CO1	1.0353	0.303536
10398	ND5	1.03069	0.305681
14182	ND6	-1.02873	0.306593
9477	CO2	-1.02549	0.308112
9221	ND4L	1.0218	0.309846
185	ND1	-1.01985	0.310764
16278	CO2	-1.01961	0.310877
16278	ND6	-1.01867	0.31132
16519	12S	1.01585	0.312653
16183	ND4	1.0158	0.312679
16172	ND4L	-1.01299	0.314009
15784	ND3	-1.0115	0.314717
8206	ATP6	-1.01139	0.314769
13590	ATP6	-1.01139	0.314769
16390	ATP6	-1.01139	0.314769
2416	ATP6	-1.01139	0.314769
10115	ATP6	-1.01139	0.314769
5046	ND1	0.999571	0.320423
16270	ND1	-0.999571	0.320423
2416	ND6	-0.99801	0.321175
10115	ND6	-0.99801	0.321175
8206	ND6	-0.99801	0.321175
13590	ND6	-0.99801	0.321175
16390	ND6	-0.99801	0.321175
16294	ATP8	-0.991649	0.324251
10819	ATP8	0.988894	0.325589
310	CO3	0.986637	0.326688
1018	ATP8	0.978208	0.330814
204	ND4L	-0.974018	0.332878
16304	ND4	-0.9651	0.337298
146	CYB	-0.959397	0.340145
146	ND4L	-0.952184	0.343768
146	ND4	-0.949355	0.345196
73	ND5	0.947951	0.345906
3010	ND6	-0.943327	0.348251
16223	16S	-0.942629	0.348606
10398	ND1	0.939892	0.35
4216	CYB	0.939352	0.350275
73	CO1	0.936824	0.351567
15784	CO1	0.933481	0.353279
189	CO1	-0.932982	0.353535
16256	ND1	0.929256	0.355451
16256	ND5	0.928362	0.355912
11914	12S	-0.928234	0.355978
10398	ND2	0.925583	0.357346
189	ND3	-0.924955	0.357671
1888	ND4	-0.92144	0.359491
16126	ND1	0.917315	0.361635
9221	ATP6	0.912667	0.364061
11914	ATP8	0.911862	0.364482
195	CO3	0.90765	0.366691
2617	CO1	-0.904216	0.368498
16294	CO2	-0.898512	0.371512
16362	ND3	-0.896248	0.372712
16311	ND2	0.894543	0.373618
73	ND6	0.888354	0.376918
2352	ND6	-0.885332	0.378535
16223	CO2	0.879467	0.381687
16278	ATP6	-0.878809	0.382042
16126	CO1	0.878338	0.382296
6221	ND3	-0.874116	0.384577
15784	CO2	0.870646	0.386459
11944	12S	0.863829	0.390171
16294	ND6	-0.86308	0.39058
16189	ND1	0.86277	0.39075
5460	CO1	0.853498	0.39584
189	CYB	-0.85225	0.396528
14182	ATP8	-0.848122	0.398809
9477	16S	0.847828	0.398972
709	12S	0.844497	0.400819
16294	CO1	-0.843722	0.40125
16256	CO1	0.838751	0.404018
182	CO1	0.838307	0.404266
8206	12S	0.836514	0.405267
13590	12S	0.836514	0.405267
16390	12S	0.836514	0.405267
2416	12S	0.836514	0.405267
10115	12S	0.836514	0.405267
5460	CO2	0.832235	0.407665
13105	16S	-0.829654	0.409114
5046	ND4L	0.821914	0.413481
16270	ND4L	-0.821914	0.413481
5460	ND2	0.821105	0.413939
16172	ND1	-0.820876	0.414068
146	ND5	-0.81852	0.415404
16129	ND4	-0.818198	0.415587
9221	12S	-0.816471	0.416568
16183	CO1	0.816104	0.416776
3594	CO3	-0.813016	0.418535
7256	CO3	-0.813016	0.418535
13650	CO3	-0.813016	0.418535
769	CO3	0.813016	0.418535
4104	CO3	-0.813016	0.418535
16192	ND2	-0.810786	0.419808
16362	ATP6	-0.807274	0.421816
16223	CO3	0.801986	0.424851
73	ND2	0.800113	0.425929
2617	ND5	-0.798568	0.42682
2352	ATP8	-0.797823	0.42725
5460	CO3	0.797254	0.427578
709	ND1	0.797018	0.427715
4216	CO1	0.7957	0.428476
16362	ND4L	0.794786	0.429005
9477	CYB	0.794043	0.429435
16294	ATP6	-0.792566	0.43029
3010	ND5	-0.792181	0.430514
3594	ND1	-0.789582	0.432022
7256	ND1	-0.789582	0.432022
13650	ND1	-0.789582	0.432022
769	ND1	0.789582	0.432022
4104	ND1	-0.789582	0.432022
11944	ND6	-0.787243	0.433382
4216	ATP8	-0.78649	0.43382
11914	CYB	0.786165	0.43401
709	ND6	0.782611	0.436083
16183	16S	0.772348	0.442102
16192	12S	-0.759151	0.449913
2352	CO1	-0.757535	0.450875
6221	ND4	0.757193	0.451079
14905	ATP8	-0.756008	0.451784
15301	12S	0.755444	0.452121
9477	ND1	0.75356	0.453246
11944	16S	-0.751403	0.454536
189	16S	0.749898	0.455437
1888	ATP8	-0.744509	0.458671
11944	CO2	0.743537	0.459257
6221	ATP8	0.733559	0.465284
11914	ND2	0.733362	0.465404
16129	ATP8	0.732272	0.466065
16304	ND5	-0.7262	0.469759
709	ND2	0.724201	0.470979
11944	CO3	-0.71928	0.473989
16278	ND4	-0.718575	0.474421
189	ND1	-0.717648	0.474989
10398	CYB	0.717382	0.475153
9477	ND6	0.710157	0.479597
9221	16S	0.708228	0.480788
2416	ND2	-0.7051	0.482722
8206	ND2	-0.7051	0.482722
10115	ND2	-0.7051	0.482722
13590	ND2	-0.7051	0.482722
16390	ND2	-0.7051	0.482722
16278	ND1	-0.695126	0.488918
16278	CO1	-0.691229	0.491351
13105	ND1	-0.688156	0.493273
16189	CO1	0.687587	0.49363
8206	CO2	0.685955	0.494653
13590	CO2	0.685955	0.494653
16390	CO2	0.685955	0.494653
2416	CO2	0.685955	0.494653
10115	CO2	0.685955	0.494653
14182	12S	0.680839	0.497868
15784	ND6	0.678218	0.49952
195	CYB	0.670375	0.50448
3010	CO1	-0.66639	0.50701
16278	ND4L	-0.665474	0.507593
185	ND3	-0.664161	0.508428
16172	CO2	-0.660173	0.510971
16192	16S	-0.659363	0.511488
1888	16S	-0.656826	0.51311
195	ATP8	-0.655977	0.513654
16270	CO1	-0.654924	0.514328
5046	CO1	0.654924	0.514328
16189	16S	-0.653576	0.515192
4216	ND1	0.653186	0.515441
16294	12S	-0.647656	0.518995
9221	CO2	-0.647617	0.51902
14182	ND5	0.644922	0.520757
16304	CO3	-0.642884	0.522072
14905	ND3	0.64132	0.523082
152	ND4L	-0.640762	0.523442
16183	ND3	0.640078	0.523885
152	ND2	0.638142	0.525138
9221	CO1	0.628491	0.531408
204	ND2	-0.625751	0.533195
6221	CO1	0.62379	0.534476
14905	16S	0.62047	0.536649
4216	16S	0.620218	0.536813
15784	12S	0.618376	0.538021
11914	CO3	0.616877	0.539004
16129	CO2	0.613016	0.541542
2416	16S	-0.606012	0.546161
8206	16S	-0.606012	0.546161
10115	16S	-0.606012	0.546161
13590	16S	-0.606012	0.546161
16390	16S	-0.606012	0.546161
11944	ATP6	-0.60119	0.549352
152	ND3	-0.600072	0.550093
150	CO3	0.596971	0.552152
204	ND1	-0.592259	0.555287
1018	ND1	0.590793	0.556265
16223	ATP6	0.589216	0.557317
4216	CO3	0.588677	0.557676
2352	ND2	-0.58811	0.558055
146	ND6	-0.587938	0.55817
3010	ATP8	-0.586507	0.559127
16256	ATP8	0.586345	0.559235
11944	ATP8	-0.583769	0.560959
150	ND3	0.583753	0.560969
6221	12S	-0.582692	0.56168
16192	ND5	-0.578139	0.564736
769	ND6	0.576518	0.565826
3594	ND6	-0.576518	0.565826
7256	ND6	-0.576518	0.565826
13650	ND6	-0.576518	0.565826
4104	ND6	-0.576518	0.565826
13708	ND6	-0.573763	0.567679
152	ND6	-0.572567	0.568486
310	ND6	-0.572424	0.568582
16223	ATP8	0.569872	0.570304
16189	ATP8	0.569578	0.570502
3010	16S	-0.567836	0.571679
16311	ATP8	0.563148	0.574852
16256	16S	0.561954	0.575662
13708	ND4	-0.55942	0.577381
8206	ND1	-0.551774	0.582585
13590	ND1	-0.551774	0.582585
16390	ND1	-0.551774	0.582585
2416	ND1	-0.551774	0.582585
10115	ND1	-0.551774	0.582585
16362	12S	-0.547916	0.58522
14182	ND4L	-0.544652	0.587453
185	ATP8	0.544243	0.587733
204	ND3	-0.538024	0.592
152	ND1	-0.53764	0.592264
1888	ND1	-0.536398	0.593119
1018	16S	-0.535227	0.593924
2617	ND4L	-0.533947	0.594805
1018	ND3	-0.532815	0.595586
16223	CYB	0.532735	0.59564
11944	ND5	-0.531941	0.596188
13708	CO3	0.531324	0.596613
310	ATP8	-0.522075	0.603009
16294	ND3	0.517268	0.606345
11914	ND6	0.509603	0.611682
9221	ND1	0.50649	0.613856
16304	12S	0.504234	0.615433
3594	ND2	-0.504092	0.615533
7256	ND2	-0.504092	0.615533
13650	ND2	-0.504092	0.615533
4104	ND2	-0.504092	0.615533
769	ND2	0.504092	0.615533
152	ND5	-0.500936	0.617742
16294	ND2	-0.500441	0.618089
9477	12S	0.499567	0.618702
709	CO1	0.498648	0.619346
1018	ND6	0.497906	0.619867
16256	ND4L	0.49624	0.621037
11944	ND1	-0.495803	0.621344
310	ND2	0.494797	0.622051
152	ATP6	0.494089	0.622549
16278	CYB	-0.49235	0.623772
8206	CO3	-0.4923	0.623807
13590	CO3	-0.4923	0.623807
16390	CO3	-0.4923	0.623807
2416	CO3	-0.4923	0.623807
10115	CO3	-0.4923	0.623807
204	CO2	0.490534	0.625051
16278	ND2	-0.485117	0.628872
16192	CYB	-0.484254	0.629481
8206	CO1	-0.483349	0.630121
13590	CO1	-0.483349	0.630121
16390	CO1	-0.483349	0.630121
2416	CO1	-0.483349	0.630121
10115	CO1	-0.483349	0.630121
3594	ND5	-0.481377	0.631516
7256	ND5	-0.481377	0.631516
13650	ND5	-0.481377	0.631516
769	ND5	0.481377	0.631516
4104	ND5	-0.481377	0.631516
2352	CO3	0.480026	0.632471
15784	ND4L	-0.477682	0.634132
15784	ATP6	0.471912	0.638228
16223	12S	-0.469143	0.640197
204	ATP8	-0.466473	0.642099
189	12S	0.46519	0.643013
2617	ND6	-0.447432	0.655729
1018	ND2	0.447372	0.655772
16183	CYB	0.444433	0.657886
16311	16S	0.441925	0.659693
16192	ATP6	-0.438201	0.662379
9477	ATP6	0.436986	0.663256
195	CO1	-0.435953	0.664003
13708	CO1	-0.430624	0.667858
310	CYB	0.429682	0.66854
14905	12S	0.42863	0.669303
16129	CO3	-0.426943	0.670526
769	16S	-0.416739	0.677945
3594	16S	0.416739	0.677945
7256	16S	0.416739	0.677945
13650	16S	0.416739	0.677945
4104	16S	0.416739	0.677945
16129	ATP6	0.410127	0.68277
152	ND4	-0.407979	0.68434
15784	ND2	0.407386	0.684774
16192	ND6	-0.404301	0.687032
182	ND1	-0.402957	0.688016
16172	CO1	-0.401363	0.689185
182	CYB	0.398096	0.691582
2352	ND1	-0.396264	0.692927
9221	CO3	0.394363	0.694324
3594	CO1	-0.39341	0.695025
7256	CO1	-0.39341	0.695025
13650	CO1	-0.39341	0.695025
4104	CO1	-0.39341	0.695025
769	CO1	0.39341	0.695025
1018	CO3	0.392432	0.695745
195	ND2	-0.38373	0.70216
16172	ND3	0.381644	0.703701
310	ND4	-0.381387	0.703891
9221	ND2	0.376612	0.707423
16223	ND4	-0.375201	0.708468
10819	12S	-0.37367	0.709603
13708	ND4L	0.372211	0.710685
16294	16S	-0.371841	0.710959
185	ND4L	-0.371826	0.71097
6221	ND1	0.368488	0.713448
16223	CO1	0.365795	0.715449
16256	ND6	0.364942	0.716083
13105	CO1	-0.364891	0.716121
310	ATP6	0.36483	0.716166
16362	ND4	0.356401	0.722445
16172	ATP8	-0.35511	0.723408
182	ND6	0.354711	0.723706
310	ND3	0.352704	0.725204
189	CO2	-0.34983	0.727352
13708	ND3	0.347697	0.728948
3594	CYB	-0.346619	0.729755
7256	CYB	-0.346619	0.729755
13650	CYB	-0.346619	0.729755
769	CYB	0.346619	0.729755
4104	CYB	-0.346619	0.729755
15784	ATP8	0.345409	0.730661
2617	ND4	-0.345217	0.730804
195	ATP6	0.334856	0.738578
16192	CO2	-0.333762	0.739401
16172	ND4	-0.333704	0.739444
11944	CYB	-0.33328	0.739763
16126	ATP8	0.330524	0.741837
16129	ND2	0.327542	0.744083
11914	ND3	-0.324304	0.746524
13708	16S	0.322557	0.747842
189	ATP8	-0.322394	0.747965
11944	CO1	-0.320661	0.749273
10819	CO3	0.319944	0.749815
182	CO3	-0.318767	0.750704
16192	CO1	-0.318098	0.751209
10819	ND3	-0.314302	0.754081
16223	ND2	0.314071	0.754255
10398	ND4L	0.309342	0.757837
11914	ND1	0.306345	0.760109
16304	CO1	-0.29183	0.771144
310	CO2	0.290642	0.77205
16189	ND4L	-0.290161	0.772417
152	ATP8	0.289332	0.773049
1018	ND5	0.28449	0.776744
3594	ND4	-0.280661	0.779669
7256	ND4	-0.280661	0.779669
13650	ND4	-0.280661	0.779669
4104	ND4	-0.280661	0.779669
769	ND4	0.280661	0.779669
204	CO3	-0.277335	0.782213
4104	ND3	0.276084	0.78317
769	ND3	-0.276084	0.78317
3594	ND3	0.276084	0.78317
7256	ND3	0.276084	0.78317
13650	ND3	0.276084	0.78317
16183	12S	-0.274859	0.784108
16256	ND2	0.26278	0.793371
16189	12S	-0.259343	0.796013
709	ND3	0.257038	0.797786
16129	ND6	-0.25609	0.798515
16192	ND3	-0.252974	0.800914
182	ATP6	-0.25109	0.802365
6221	CYB	-0.245855	0.806402
16362	16S	0.245694	0.806526
15784	ND4	-0.24518	0.806922
16223	ND1	-0.243133	0.808502
3594	ND4L	-0.24267	0.80886
7256	ND4L	-0.24267	0.80886
13650	ND4L	-0.24267	0.80886
4104	ND4L	-0.24267	0.80886
769	ND4L	0.24267	0.80886
709	CO3	0.235293	0.814561
16192	ND1	-0.232174	0.816974
16294	ND4	0.231777	0.817282
16362	ND2	-0.226608	0.821286
16294	CO3	-0.226268	0.821549
16189	ND6	0.225674	0.82201
146	ATP6	-0.223362	0.823803
11914	ND5	0.221861	0.824967
16278	ATP8	-0.215664	0.829779
1018	CO1	0.215608	0.829822
189	CO3	-0.215444	0.82995
709	ATP8	0.212079	0.832565
16362	CYB	0.205668	0.837554
10398	ND3	-0.20558	0.837622
16294	ND4L	0.201267	0.840983
2352	CO2	-0.200458	0.841613
769	12S	0.199565	0.842309
3594	12S	-0.199565	0.842309
4104	12S	-0.199565	0.842309
7256	12S	-0.199565	0.842309
13650	12S	-0.199565	0.842309
16129	CO1	-0.197089	0.844239
152	CO1	-0.196302	0.844853
15301	16S	-0.192745	0.847629
1888	ND4L	-0.190543	0.849349
1888	CO2	-0.18973	0.849984
1888	ND5	0.189389	0.85025
16192	CO3	-0.187387	0.851815
13105	CO2	0.18272	0.855463
14182	16S	0.179307	0.858134
146	CO3	0.179233	0.858191
11914	ND4L	-0.178599	0.858688
15784	CYB	0.178168	0.859025
15784	CO3	0.176604	0.86025
16294	ND5	-0.174155	0.862168
16129	ND1	0.173769	0.86247
13708	ND1	-0.17007	0.865369
16223	ND5	-0.169204	0.866048
16172	CO3	0.168429	0.866655
16129	CYB	0.166279	0.868342
16129	ND5	-0.165662	0.868826
2352	ND4	-0.164996	0.869348
146	ND1	-0.164579	0.869676
1888	12S	-0.157593	0.87516
146	ND2	-0.154545	0.877555
16223	ND6	0.152217	0.879385
182	ND4L	-0.151725	0.879772
16172	CYB	-0.148923	0.881976
182	ND2	0.148227	0.882523
4216	ND4L	0.148119	0.882608
2416	ATP8	-0.146968	0.883514
10115	ATP8	-0.146968	0.883514
8206	ATP8	-0.146968	0.883514
13590	ATP8	-0.146968	0.883514
16390	ATP8	-0.146968	0.883514
16189	ND5	-0.144945	0.885106
9477	ATP8	0.143223	0.886461
10398	ATP8	0.141346	0.887939
10398	12S	0.140954	0.888248
146	ATP8	-0.140044	0.888965
1018	ND4L	0.137281	0.891141
146	CO1	0.134554	0.89329
6221	ND2	0.13093	0.896148
16270	ATP8	-0.130375	0.896585
5046	ATP8	0.130375	0.896585
6221	16S	-0.125952	0.900074
16183	CO3	-0.123245	0.902211
2352	ATP6	0.122149	0.903077
11944	ND2	-0.121409	0.903661
16223	ND4L	-0.113512	0.909899
152	CO3	0.111697	0.911333
152	12S	0.110781	0.912057
310	12S	0.104799	0.916788
310	CO1	0.102965	0.918239
15784	ND5	0.102033	0.918977
13708	CO2	-0.10175	0.919201
150	16S	0.101119	0.9197
6221	ATP6	-0.0995077	0.920975
16311	12S	-0.0975053	0.92256
16362	CO1	0.0959601	0.923784
16362	ND1	-0.089096	0.92922
16304	16S	-0.0884965	0.929695
15784	16S	-0.0858967	0.931755
16294	ND1	-0.0791939	0.937069
146	16S	-0.0751023	0.940314
16192	ND4	0.0738663	0.941295
152	CYB	0.0723646	0.942486
204	16S	-0.0702061	0.944199
182	ND5	-0.0681388	0.945839
182	ATP8	0.0644507	0.948766
16294	CYB	-0.0617059	0.950945
1018	ND4	-0.0611873	0.951357
9477	CO3	-0.0596835	0.952551
15784	ND1	-0.0566824	0.954934
195	ND3	-0.0555044	0.95587
16362	ND6	-0.0525189	0.958241
11914	ND4	0.052371	0.958359
16192	ATP8	-0.0517467	0.958855
10398	CO2	0.0494212	0.960702
182	ND4	-0.04839	0.961522
16129	ND3	0.0471292	0.962523
9221	ATP8	-0.0460823	0.963355
310	ND1	-0.044582	0.964548
9477	ND2	0.0357761	0.971547
16129	ND4L	-0.035416	0.971833
1018	CYB	0.0352006	0.972004
14905	CO3	0.0344492	0.972602
16172	ATP6	-0.0315897	0.974875
16192	ND4L	-0.0310679	0.97529
10819	16S	-0.0261883	0.97917
3010	12S	-0.0236421	0.981195
1018	12S	-0.0207132	0.983524
152	16S	-0.0201617	0.983963
13708	12S	-0.0184945	0.985289
182	ND3	0.0179614	0.985713
16362	ATP8	0.0161468	0.987156
195	ND1	0.0157523	0.98747
16278	CO3	-0.0146614	0.988337
2352	CYB	-0.0140063	0.988859
13105	CO3	0.0122665	0.990242
