# Supplementary material for: Ancient Out-of-Africa Mitochondrial DNA Variants Associate with Distinct Mitochondrial Gene Expression Patterns
Source: PLoS Genet. 2016 Nov 3;12(11):e1006407. doi: 10.1371/journal.pgen.1006407 (PMC5094714; doi:10.1371/journal.pgen.1006407)
Supplement: S7 Table — Number of individuals per SNP is listed. Information indicated in columns E-H is available only for SNPs that passed the p-value cutoff after Bonferroni correction (3.95e-5) in the two tested groups. (XLSX) [file pgen.1006407.s012.xlsx]

## Sheet: Sheet1
SNP	Gene	t-stat	p-value	Group Size	Allele	Group Members	Additional Individuals
709	MT-TR	-6.47354	3.1277e-10	50	A	all W, all T	K2a3; K2a; U8a1b; H8; H13a1a1d1; K2a8; V1a1a; H92; H8c; H26c;K2a11
15928	MT-TR	-6.47342	3.12984e-10	29	A	all T	H60a (T)
15607	MT-TR	6.45014	3.59279e-10	28	G	all T
10463	MT-TR	-6.45014	3.59279e-10	28	C	all T
8697	MT-TR	-6.45014	3.59279e-10	28	A	all T
14905	MT-TR	-6.45014	3.59279e-10	28	A	all T
4917	MT-TR	6.35054	6.45429e-10	29	G	all T	U4a
1888	MT-TR	-6.20819	1.4731e-09	29	A	all T	H14b
16129	MT-TG	-5.99031	5.06724e-09	19	A; C		H1; H27a; I5a2; H27; H2a2a1e; U2e1b; U5b2a2c; I1a1a2; U5a2a; I2c; H3b; I1a1b; U2e1; H2a2a2; K1a4f1; U5b1; I2a1a; U2e1f1; I4a2
13368	MT-TR	-5.74615	1.94266e-08	31	A	all T	HV15; K1a2a1; HV1b2
204	MT-TG	-5.2102	3.17869e-07	31	C	all W, all I	H6a1b3; H55; X2d1a; T1a10; U5a1j
4216	MT-TR	-5.13882	4.53719e-07	58	C	all JT
11251	MT-TR	5.13882	4.53719e-07	58	C	all JT
15452	MT-TR	-5.13882	4.53719e-07	58	A	all JT
16294	MT-TR	5.10827	5.27712e-07	32	T	all T	U5a2a1a; U5a2a1e; U5a2a; H5e1b; U5a2a1d; U5a2a1
16126	MT-TR	-5.01636	8.27793e-07	59	C	most JT	U5a4; K2b1a3; -J2a1a1
12372	MT-TL2	-4.69078	3.86728e-06	105	A	all UK
11467	MT-TL2	4.69078	3.86728e-06	105	C	all UK
9477	MT-TL2	-4.60753	5.65915e-06	61	A	all U5
10398	MT-TG	4.52565	8.18518e-06	54	G	most JKI
12705	MT-TG	4.48725	9.71366e-06	25	T	all WXI
3197	MT-TL2	-4.46922	1.05227e-05	62	C	all U5	H14b
13617	MT-TL2	-4.46922	1.05227e-05	62	C	all U5	H14b
12308	MT-TL2	4.46526	1.07084e-05	103	C	most UK
16223	MT-TG	4.36399	1.66944e-05	27	T	all WXI	U2e1b; U4a2b
7028	MT-TL2	4.06418	5.91844e-05
14766	MT-TL2	4.0553	6.13757e-05
2706	MT-TL2	4.05228	6.21383e-05
16294	MT-TW	3.99211	7.93515e-05
5046	MT-TR	-3.97701	8.43353e-05
16362	MT-TC	-3.95122	9.35357e-05
16304	MT-TR	-3.89709	0.000116038
16270	MT-TL2	3.8864	0.00012105
462	MT-TL1	3.84892	0.000140288
11719	MT-TL2	-3.78734	0.000178309
150	MT-TL2	3.49178	0.000539301
7768	MT-TL2	3.4501	0.000626688
295	MT-TL1	3.33191	0.000951695
16069	MT-TL1	3.33191	0.000951695
14182	MT-TL2	-3.30534	0.00104374
16304	MT-TP	-3.29348	0.00108743
73	MT-TL2	3.28272	0.00112849
12612	MT-TL1	3.27164	0.00117233
150	MT-TE	3.18929	0.00155095
16172	MT-TL1	-3.1881	0.00155718
489	MT-TL1	-3.18015	0.00159936
8206	MT-TW	-3.15279	0.00175256
185	MT-TL1	-3.13564	0.00185541
204	MT-TR	-3.00638	0.00282885
14766	MT-TR	2.97227	0.00315431
16304	MT-TF	-2.88341	0.00416974
14766	MT-TE	2.8654	0.00440866
150	MT-TA	2.8577	0.00451462
11719	MT-TR	-2.85549	0.00454538
11719	MT-TE	-2.76575	0.00597116
2617	MT-TL1	-2.76322	0.00601668
5656	MT-TL2	2.71138	0.00702071
2617	MT-TY	-2.70736	0.00710442
2706	MT-TR	2.67636	0.00778208
189	MT-TR	2.65835	0.00820175
16390	MT-TY	-2.64916	0.00842371
185	MT-TY	-2.6462	0.00849646
2706	MT-TE	2.64587	0.00850449
7028	MT-TE	2.63897	0.0086762
14793	MT-TL2	2.63515	0.00877254
7028	MT-TR	2.62764	0.00896483
13590	MT-TT	-2.61915	0.00918669
16390	MT-TI	-2.58399	0.0101587
16129	MT-TP	2.48421	0.0134366
15928	MT-TW	-2.48009	0.0135901
12705	MT-TR	2.47749	0.013688
16270	MT-TE	2.47401	0.0138196
15607	MT-TW	2.47173	0.0139068
10463	MT-TW	-2.47173	0.0139068
8697	MT-TW	-2.47173	0.0139068
14905	MT-TW	-2.47173	0.0139068
4917	MT-TW	2.46299	0.0142443
16256	MT-TA	-2.44481	0.0149705
16223	MT-TR	2.44077	0.0151361
16129	MT-TY	2.41159	0.0163815
1888	MT-TW	-2.38166	0.0177525
2617	MT-TF	-2.37007	0.0183095
12308	MT-TR	-2.34508	0.0195642
73	MT-TR	2.3419	0.0197288
5460	MT-TR	-2.3332	0.0201861
16172	MT-TG	-2.32063	0.0208634
14182	MT-TE	-2.30197	0.0219057
5046	MT-TF	-2.30011	0.0220116
16192	MT-TL2	2.292	0.0224806
13368	MT-TW	-2.26431	0.0241476
14798	MT-TL1	-2.25483	0.0247429
7768	MT-TE	2.22487	0.0267076
13708	MT-TL1	-2.20746	0.0279103
12612	MT-TH	2.20516	0.0280728
2617	MT-TE	-2.19095	0.0290939
16183	MT-TA	-2.18418	0.0295916
16519	MT-TL2	2.16544	0.0310083
185	MT-TF	-2.16425	0.0311005
9698	MT-TP	2.15781	0.031602
11467	MT-TR	-2.15466	0.0318498
12372	MT-TR	2.15466	0.0318498
13590	MT-TS2	-2.12394	0.0343544
16126	MT-TF	-2.1227	0.0344594
2617	MT-TP	-2.10285	0.0361704
14766	MT-TG	2.07546	0.0386514
16390	MT-TF	-2.07309	0.0388732
6221	MT-TP	2.06302	0.039825
73	MT-TE	2.06148	0.0399732
13708	MT-TH	-2.05988	0.0401264
9477	MT-TE	-2.03413	0.0426695
16304	MT-TA	-2.03291	0.0427934
462	MT-TY	2.03254	0.0428306
3197	MT-TE	-2.00099	0.0461412
13617	MT-TE	-2.00099	0.0461412
3010	MT-TL2	1.99063	0.0472748
16390	MT-TL2	-1.96969	0.0496385
15784	MT-TL1	1.95274	0.0516233
14793	MT-TA	-1.95159	0.0517594
16304	MT-TY	-1.93366	0.053937
4216	MT-TL1	-1.93214	0.0541247
11251	MT-TL1	1.93214	0.0541247
15452	MT-TL1	-1.93214	0.0541247
9698	MT-TR	1.92219	0.0553688
16172	MT-TE	-1.91924	0.0557425
709	MT-TF	-1.91916	0.0557523
14766	MT-TF	1.91669	0.0560667
152	MT-TH	1.9116	0.0567185
12372	MT-TE	-1.9015	0.058032
11467	MT-TE	1.9015	0.058032
9055	MT-TR	1.89533	0.0588477
16126	MT-TL1	-1.89465	0.0589374
146	MT-TP	1.88541	0.0601773
709	MT-TY	-1.88274	0.0605395
11719	MT-TG	-1.8729	0.0618906
10819	MT-TG	1.86861	0.0624872
16390	MT-TL1	-1.86326	0.0632375
16256	MT-TL2	1.85362	0.0646086
709	MT-TW	-1.81632	0.0701508
6221	MT-TW	-1.79982	0.0727235
152	MT-TP	1.79712	0.073152
16311	MT-TR	1.79683	0.073199
13708	MT-TF	-1.79004	0.0742862
185	MT-TG	-1.78669	0.0748259
3010	MT-TY	-1.78174	0.0756323
16189	MT-TT	1.78042	0.0758482
16519	MT-TP	1.77595	0.076584
7028	MT-TC	-1.76611	0.0782217
5046	MT-TI	-1.75519	0.0800752
2706	MT-TC	-1.75501	0.0801067
2706	MT-TF	1.75178	0.0806616
7028	MT-TG	1.74311	0.0821664
16183	MT-TH	1.74308	0.0821712
16304	MT-TS2	-1.74102	0.082532
5656	MT-TE	1.73538	0.0835266
1811	MT-TR	-1.72694	0.0850333
4216	MT-TF	-1.72636	0.0851383
11251	MT-TF	1.72636	0.0851383
15452	MT-TF	-1.72636	0.0851383
16189	MT-TG	1.72062	0.0861775
16311	MT-TF	1.71867	0.0865327
462	MT-TP	1.71377	0.0874295
16311	MT-TP	1.7084	0.0884212
204	MT-TT	-1.70426	0.0891921
12612	MT-TI	1.70198	0.0896205
7028	MT-TF	1.69918	0.0901464
16304	MT-TT	-1.69608	0.0907323
16192	MT-TS2	-1.68952	0.0919833
11719	MT-TF	-1.68628	0.0926053
14182	MT-TA	-1.6831	0.0932196
295	MT-TI	1.67471	0.0948566
16069	MT-TI	1.67471	0.0948566
73	MT-TC	-1.67029	0.0957278
2706	MT-TG	1.66733	0.0963159
204	MT-TI	-1.66533	0.0967151
15784	MT-TA	1.66269	0.0972419
152	MT-TL2	1.65269	0.0992627
16256	MT-TS2	-1.65093	0.0996231
3010	MT-TR	1.6475	0.100326
12308	MT-TE	1.63405	0.103121
462	MT-TH	1.61083	0.108091
16362	MT-TR	-1.60658	0.10902
10398	MT-TL1	1.60346	0.109707
16304	MT-TI	-1.59942	0.110603
150	MT-TI	1.59755	0.111019
16189	MT-TC	1.58736	0.113308
462	MT-TG	1.58043	0.114885
4216	MT-TY	-1.58	0.114982
15452	MT-TY	-1.58	0.114982
11251	MT-TY	1.58	0.114982
16172	MT-TT	-1.5706	0.117151
73	MT-TG	1.56885	0.11756
16304	MT-TW	-1.56863	0.11761
16129	MT-TA	-1.56373	0.118758
16189	MT-TW	-1.5627	0.118999
16519	MT-TL1	1.55641	0.120486
462	MT-TF	1.52917	0.127099
2706	MT-TM	-1.52314	0.1286
73	MT-TF	1.52016	0.129345
16126	MT-TY	-1.51821	0.129837
15784	MT-TL2	1.51159	0.131513
2617	MT-TM	-1.50778	0.132487
12705	MT-TF	1.50355	0.133572
295	MT-TY	1.49934	0.13466
16069	MT-TY	1.49934	0.13466
5046	MT-TA	-1.4987	0.134825
4216	MT-TW	-1.48911	0.137331
15452	MT-TW	-1.48911	0.137331
11251	MT-TW	1.48911	0.137331
1811	MT-TP	-1.48241	0.139103
13368	MT-TT	1.47963	0.139845
7028	MT-TM	-1.47509	0.141061
16126	MT-TS2	-1.47479	0.14114
6221	MT-TF	-1.47342	0.141509
7768	MT-TA	1.47142	0.142049
195	MT-TG	1.46683	0.143292
16189	MT-TF	1.45969	0.145244
16129	MT-TL1	1.45927	0.14536
16126	MT-TW	-1.45888	0.145468
295	MT-TF	1.45566	0.146355
16069	MT-TF	1.45566	0.146355
295	MT-TH	1.45329	0.147012
16069	MT-TH	1.45329	0.147012
16256	MT-TH	-1.45327	0.147019
9055	MT-TP	1.4446	0.149437
16270	MT-TS2	-1.44353	0.14974
16304	MT-TL1	-1.44297	0.149896
73	MT-TM	-1.4398	0.150791
11914	MT-TE	-1.43775	0.151371
16256	MT-TI	-1.42838	0.154047
11719	MT-TC	1.42064	0.156286
12612	MT-TF	1.42009	0.156444
189	MT-TF	1.41789	0.157086
8206	MT-TG	-1.41123	0.159039
14766	MT-TL1	1.41091	0.159133
16278	MT-TW	1.41048	0.159261
15784	MT-TF	1.40377	0.161247
16129	MT-TH	1.40162	0.161888
146	MT-TR	1.39779	0.163033
6221	MT-TL1	1.39532	0.163778
1811	MT-TL2	1.39428	0.164092
73	MT-TW	1.38996	0.165398
16390	MT-TP	-1.38711	0.166265
14793	MT-TH	-1.38655	0.166434
16311	MT-TL1	1.38243	0.167693
10819	MT-TH	-1.37727	0.169283
16223	MT-TF	1.37559	0.169802
310	MT-TM	-1.37457	0.170117
2617	MT-TH	1.37212	0.170878
489	MT-TI	-1.37187	0.170956
462	MT-TI	1.3658	0.172853
12612	MT-TY	1.36273	0.173817
16183	MT-TC	-1.36187	0.174087
16172	MT-TH	1.35856	0.175133
5460	MT-TI	-1.3557	0.176043
13590	MT-TA	-1.35025	0.17778
310	MT-TF	1.34854	0.17833
16311	MT-TY	1.34483	0.179524
150	MT-TS2	1.34255	0.18026
11719	MT-TL1	-1.33592	0.182418
12612	MT-TG	1.33359	0.18318
489	MT-TH	-1.32806	0.184996
12612	MT-TS2	1.31937	0.187881
295	MT-TG	1.31525	0.189262
16069	MT-TG	1.31525	0.189262
14766	MT-TC	-1.31145	0.19054
195	MT-TH	-1.298	0.195116
14798	MT-TH	-1.2975	0.195287
11914	MT-TT	-1.29544	0.195996
12705	MT-TL1	-1.29444	0.19634
204	MT-TA	-1.29358	0.196638
16278	MT-TP	-1.28917	0.198164
12705	MT-TI	1.28688	0.198959
16519	MT-TG	-1.28635	0.199147
12612	MT-TA	1.27201	0.204187
150	MT-TC	-1.27093	0.204573
11719	MT-TM	1.25904	0.208829
152	MT-TA	-1.25846	0.209039
489	MT-TY	-1.25586	0.209978
2706	MT-TI	1.25035	0.211981
16304	MT-TG	-1.24987	0.212158
10819	MT-TY	-1.24714	0.213155
185	MT-TP	-1.24668	0.213322
3010	MT-TC	1.2417	0.215153
5656	MT-TC	-1.23724	0.216801
195	MT-TR	-1.23575	0.217354
16519	MT-TR	-1.23346	0.218207
204	MT-TW	-1.23092	0.219156
2617	MT-TR	-1.22952	0.219679
9055	MT-TF	1.22923	0.219786
189	MT-TI	1.22918	0.219805
16270	MT-TR	-1.22724	0.220532
16223	MT-TI	1.21998	0.22327
14766	MT-TM	-1.21864	0.223778
16129	MT-TT	-1.20284	0.229825
9055	MT-TI	1.20233	0.230023
185	MT-TI	-1.20043	0.230758
295	MT-TS2	1.19711	0.23205
16069	MT-TS2	1.19711	0.23205
12705	MT-TP	-1.19479	0.232953
16519	MT-TI	1.1869	0.236048
9477	MT-TH	1.18494	0.23682
16223	MT-TL1	-1.18186	0.238038
4216	MT-TS2	-1.17901	0.239171
15452	MT-TS2	-1.17901	0.239171
11251	MT-TS2	1.17901	0.239171
4216	MT-TE	-1.17884	0.23924
15452	MT-TE	-1.17884	0.23924
11251	MT-TE	1.17884	0.23924
295	MT-TP	1.17749	0.239776
16069	MT-TP	1.17749	0.239776
16183	MT-TL2	-1.1744	0.241008
3197	MT-TH	1.17246	0.241786
13617	MT-TH	1.17246	0.241786
7028	MT-TI	1.16882	0.243246
16183	MT-TF	-1.16297	0.245612
12372	MT-TW	1.16198	0.24601
11467	MT-TW	-1.16198	0.24601
16270	MT-TH	-1.15809	0.247593
310	MT-TY	-1.15529	0.248736
489	MT-TF	-1.15509	0.248818
16126	MT-TI	-1.15155	0.250268
16278	MT-TI	1.14733	0.252004
15784	MT-TE	1.14337	0.253642
9055	MT-TL2	1.13891	0.255494
11944	MT-TT	1.13715	0.256232
16183	MT-TY	1.13661	0.256454
12308	MT-TW	-1.13478	0.257219
8206	MT-TS2	-1.13431	0.257419
310	MT-TC	-1.1331	0.257922
2617	MT-TW	-1.12858	0.259823
16390	MT-TG	-1.12677	0.26059
16362	MT-TG	1.12505	0.261315
709	MT-TS2	-1.12236	0.262454
16519	MT-TY	1.12013	0.263401
16311	MT-TM	1.11756	0.264496
152	MT-TL1	1.11247	0.266675
195	MT-TP	1.10363	0.27049
4216	MT-TC	1.1013	0.271499
15452	MT-TC	1.1013	0.271499
11251	MT-TC	-1.1013	0.271499
11914	MT-TP	1.09814	0.272877
14793	MT-TS2	-1.09763	0.273099
13368	MT-TL1	1.09093	0.276032
12612	MT-TP	1.08836	0.277162
4917	MT-TF	1.08543	0.278458
185	MT-TR	-1.0823	0.279841
16126	MT-TG	-1.08154	0.280177
16270	MT-TG	-1.08101	0.280416
4216	MT-TG	-1.07953	0.281073
15452	MT-TG	-1.07953	0.281073
11251	MT-TG	1.07953	0.281073
8206	MT-TH	-1.07585	0.282713
3010	MT-TH	-1.07568	0.28279
709	MT-TC	-1.07456	0.283289
152	MT-TF	-1.06795	0.286256
489	MT-TG	-1.06678	0.286784
16126	MT-TC	1.06434	0.287887
16294	MT-TI	-1.06399	0.288043
12705	MT-TT	1.06386	0.288103
10398	MT-TH	1.06378	0.288139
489	MT-TA	-1.06241	0.288758
16189	MT-TL2	-1.0601	0.289808
13590	MT-TI	-1.05588	0.291731
16192	MT-TE	1.05563	0.291845
15784	MT-TS2	1.05306	0.293019
15928	MT-TT	1.0498	0.294511
16362	MT-TL2	-1.03206	0.302735
295	MT-TA	1.03072	0.303363
16069	MT-TA	1.03072	0.303363
14793	MT-TI	-1.0283	0.304498
15784	MT-TT	1.02723	0.305001
16129	MT-TI	1.02715	0.305037
11944	MT-TP	1.02499	0.306052
16270	MT-TY	-1.02455	0.30626
8701	MT-TI	-1.02114	0.307874
6221	MT-TY	1.02011	0.308361
204	MT-TL1	1.01886	0.308954
3010	MT-TF	1.01691	0.309876
16294	MT-TC	-1.01649	0.310079
6221	MT-TC	1.01383	0.311343
489	MT-TS2	-1.01371	0.311399
16294	MT-TT	-1.00769	0.314278
16294	MT-TA	-1.00762	0.31431
14798	MT-TG	-1.00624	0.314974
9698	MT-TF	1.00304	0.316512
11467	MT-TG	-1.00236	0.316843
12372	MT-TG	1.00236	0.316843
3197	MT-TR	1.00221	0.316916
13617	MT-TR	1.00221	0.316916
16223	MT-TT	1.00194	0.317043
16129	MT-TR	1.00097	0.317514
462	MT-TR	1.00071	0.317639
10819	MT-TL1	-0.998166	0.318867
489	MT-TP	-0.994738	0.32053
3010	MT-TP	-0.990658	0.322516
12308	MT-TG	-0.989165	0.323245
16189	MT-TH	0.98775	0.323937
16256	MT-TE	0.985937	0.324824
13708	MT-TA	-0.985737	0.324922
3010	MT-TE	0.981584	0.326962
13708	MT-TG	-0.981253	0.327125
12705	MT-TY	-0.979863	0.32781
11251	MT-TI	0.978083	0.328688
4216	MT-TI	-0.978083	0.328688
15452	MT-TI	-0.978083	0.328688
10819	MT-TS2	0.974623	0.3304
152	MT-TW	-0.97452	0.330451
204	MT-TF	-0.971726	0.331837
16183	MT-TE	-0.971114	0.332142
16172	MT-TL2	0.968752	0.333317
3010	MT-TL1	-0.967256	0.334064
3010	MT-TW	0.96638	0.334501
8701	MT-TS2	-0.962538	0.336424
12705	MT-TA	0.959644	0.337877
12705	MT-TW	0.958766	0.338319
16278	MT-TL1	-0.95836	0.338523
1811	MT-TH	0.957301	0.339056
3010	MT-TA	0.951717	0.341877
6221	MT-TG	0.951601	0.341936
1888	MT-TC	0.951257	0.34211
16183	MT-TL1	-0.950357	0.342567
310	MT-TL1	-0.942946	0.346339
73	MT-TL1	0.942758	0.346435
8206	MT-TE	0.94256	0.346536
14182	MT-TC	0.93872	0.348502
16362	MT-TF	-0.936275	0.349758
11944	MT-TS2	0.934409	0.350718
7028	MT-TT	0.93095	0.352501
185	MT-TH	-0.930354	0.35281
7768	MT-TC	-0.930317	0.352829
9477	MT-TR	0.92846	0.353789
16172	MT-TF	0.928	0.354028
16311	MT-TH	0.924807	0.355684
3197	MT-TG	0.924759	0.355709
13617	MT-TG	0.924759	0.355709
2706	MT-TT	0.922887	0.356683
16183	MT-TS2	-0.92233	0.356972
8697	MT-TT	0.919845	0.358268
14905	MT-TT	0.919845	0.358268
10463	MT-TT	0.919845	0.358268
15607	MT-TT	-0.919845	0.358268
152	MT-TI	0.919368	0.358517
14798	MT-TY	-0.918322	0.359064
5460	MT-TA	-0.917184	0.359659
195	MT-TL2	-0.916893	0.359811
310	MT-TH	0.914849	0.360882
15928	MT-TF	-0.91091	0.362951
15784	MT-TG	0.908179	0.36439
13105	MT-TC	0.906558	0.365245
11944	MT-TF	0.90108	0.368146
12308	MT-TI	-0.898376	0.369584
16256	MT-TF	-0.89817	0.369693
4216	MT-TP	-0.897553	0.370022
15452	MT-TP	-0.897553	0.370022
11251	MT-TP	0.897553	0.370022
8701	MT-TG	-0.897102	0.370262
1811	MT-TI	-0.89701	0.370312
1811	MT-TT	0.894063	0.371884
13105	MT-TS2	-0.893023	0.37244
16223	MT-TW	0.892657	0.372636
11467	MT-TI	-0.891852	0.373067
12372	MT-TI	0.891852	0.373067
146	MT-TI	0.891336	0.373343
11944	MT-TH	0.888484	0.374872
12308	MT-TT	0.888075	0.375092
14793	MT-TT	0.886943	0.3757
1888	MT-TL1	0.886331	0.376029
9698	MT-TI	0.885976	0.37622
8697	MT-TC	0.885954	0.376232
10463	MT-TC	0.885954	0.376232
14905	MT-TC	0.885954	0.376232
15607	MT-TC	-0.885954	0.376232
310	MT-TR	-0.885429	0.376515
13105	MT-TA	-0.883918	0.377329
16126	MT-TH	-0.881458	0.378656
14182	MT-TI	-0.880816	0.379003
1811	MT-TY	-0.878657	0.380172
13368	MT-TH	0.874275	0.38255
12612	MT-TE	0.871536	0.384041
195	MT-TA	-0.867994	0.385974
10463	MT-TF	-0.866849	0.386601
8697	MT-TF	-0.866849	0.386601
14905	MT-TF	-0.866849	0.386601
15607	MT-TF	0.866849	0.386601
8206	MT-TL1	-0.866815	0.386619
16390	MT-TC	0.865693	0.387234
16129	MT-TL2	0.865231	0.387486
152	MT-TY	0.864836	0.387703
11944	MT-TG	0.861348	0.389618
295	MT-TE	0.861244	0.389676
16069	MT-TE	0.861244	0.389676
11467	MT-TY	-0.859865	0.390434
12372	MT-TY	0.859865	0.390434
16223	MT-TA	0.85972	0.390514
10398	MT-TT	0.857362	0.391814
462	MT-TS2	0.857183	0.391912
3197	MT-TW	0.85714	0.391936
13617	MT-TW	0.85714	0.391936
14798	MT-TS2	-0.854147	0.39359
310	MT-TP	-0.854091	0.393621
3197	MT-TT	-0.853547	0.393922
13617	MT-TT	-0.853547	0.393922
16223	MT-TY	-0.852705	0.394388
150	MT-TW	-0.850907	0.395385
15928	MT-TC	0.849389	0.396228
13368	MT-TC	0.84748	0.397289
189	MT-TA	0.845343	0.398479
5046	MT-TP	-0.844486	0.398957
16304	MT-TM	0.844398	0.399006
6221	MT-TA	0.843587	0.399459
4917	MT-TL1	-0.841111	0.400842
16129	MT-TM	0.8369	0.403203
15784	MT-TH	0.834739	0.404416
12705	MT-TM	-0.830256	0.406943
150	MT-TG	-0.829244	0.407514
9477	MT-TW	0.827063	0.408748
11467	MT-TT	0.825084	0.409869
12372	MT-TT	-0.825084	0.409869
5460	MT-TT	-0.824497	0.410201
189	MT-TL1	0.824403	0.410255
9477	MT-TG	0.824252	0.410341
13368	MT-TL2	0.823391	0.410829
14793	MT-TR	-0.823157	0.410962
146	MT-TC	-0.821512	0.411897
16278	MT-TA	-0.819196	0.413215
16270	MT-TW	-0.818155	0.413809
16129	MT-TF	0.8146	0.415839
16256	MT-TG	-0.812724	0.416912
5656	MT-TI	0.81176	0.417464
14766	MT-TA	0.809147	0.418964
15928	MT-TE	-0.808704	0.419218
11914	MT-TS2	0.807653	0.419822
204	MT-TM	0.807305	0.420023
13708	MT-TI	-0.806607	0.420424
195	MT-TY	0.804057	0.421893
8701	MT-TL2	-0.803854	0.42201
10398	MT-TA	0.802823	0.422605
2706	MT-TS2	0.802125	0.423008
3197	MT-TC	0.794968	0.427154
13617	MT-TC	0.794968	0.427154
7028	MT-TS2	0.793972	0.427733
13590	MT-TC	-0.793165	0.428203
2706	MT-TA	0.78836	0.431003
16270	MT-TC	-0.787218	0.431671
16192	MT-TR	-0.786656	0.432
16192	MT-TT	-0.786253	0.432235
7028	MT-TL1	0.785901	0.432441
5460	MT-TE	-0.785581	0.432628
195	MT-TW	-0.778062	0.437042
11914	MT-TR	0.776442	0.437996
185	MT-TS2	-0.774649	0.439054
195	MT-TF	-0.772097	0.440562
16126	MT-TP	-0.770236	0.441664
4216	MT-TH	-0.769955	0.44183
15452	MT-TH	-0.769955	0.44183
11251	MT-TH	0.769955	0.44183
11914	MT-TA	0.769159	0.442302
2617	MT-TC	-0.766615	0.443812
15784	MT-TR	0.764931	0.444813
13105	MT-TI	-0.764676	0.444964
11944	MT-TE	-0.762689	0.446147
204	MT-TY	0.762619	0.446188
8701	MT-TR	-0.761972	0.446574
7028	MT-TA	0.760047	0.447723
10398	MT-TI	0.760021	0.447738
13708	MT-TC	0.759081	0.448299
2617	MT-TL2	-0.757454	0.449272
16189	MT-TL1	0.756451	0.449872
16270	MT-TI	-0.752515	0.452232
7768	MT-TI	0.75186	0.452625
2617	MT-TS2	0.749099	0.454285
11944	MT-TC	0.746963	0.455572
11251	MT-TT	-0.746778	0.455684
4216	MT-TT	0.746778	0.455684
15452	MT-TT	0.746778	0.455684
489	MT-TE	-0.745289	0.456582
9477	MT-TC	0.743053	0.457933
8697	MT-TL1	0.742901	0.458025
14905	MT-TL1	0.742901	0.458025
15607	MT-TL1	-0.742901	0.458025
10463	MT-TL1	0.742901	0.458025
13590	MT-TL1	0.739404	0.460142
9055	MT-TM	0.733436	0.463769
14766	MT-TT	0.731026	0.465237
10463	MT-TE	-0.730161	0.465766
8697	MT-TE	-0.730161	0.465766
14905	MT-TE	-0.730161	0.465766
15607	MT-TE	0.730161	0.465766
16390	MT-TS2	-0.72888	0.466548
11944	MT-TA	0.727703	0.467267
16294	MT-TL1	-0.724424	0.469274
152	MT-TG	0.723353	0.469932
12308	MT-TY	-0.722002	0.470761
152	MT-TM	-0.716778	0.473975
12612	MT-TR	0.71657	0.474103
9055	MT-TG	0.716225	0.474315
7768	MT-TW	-0.714763	0.475217
14182	MT-TW	0.710876	0.47762
16192	MT-TG	-0.709741	0.478323
7028	MT-TP	-0.707092	0.479965
16311	MT-TT	-0.706285	0.480467
8206	MT-TL2	-0.703024	0.482494
310	MT-TS2	0.70259	0.482764
15784	MT-TP	0.700134	0.484294
9698	MT-TM	0.697614	0.485868
15928	MT-TL1	0.696805	0.486373
16304	MT-TH	-0.695479	0.487203
11467	MT-TL1	0.695261	0.487339
12372	MT-TL1	-0.695261	0.487339
6221	MT-TI	-0.694962	0.487526
310	MT-TG	0.692991	0.488761
1888	MT-TE	-0.692477	0.489083
16183	MT-TG	-0.691187	0.489892
12308	MT-TL1	0.69058	0.490273
14798	MT-TF	-0.689751	0.490794
4917	MT-TC	-0.688892	0.491334
9477	MT-TL1	-0.687666	0.492105
295	MT-TR	0.687352	0.492302
16069	MT-TR	0.687352	0.492302
9477	MT-TS2	0.685576	0.493421
9698	MT-TL1	0.685317	0.493584
7768	MT-TL1	0.685078	0.493734
15928	MT-TY	-0.68381	0.494534
11719	MT-TA	-0.679179	0.49746
146	MT-TM	0.678339	0.497992
10398	MT-TW	-0.676669	0.499049
14182	MT-TY	0.675854	0.499566
2617	MT-TG	-0.67351	0.501054
4917	MT-TT	-0.672092	0.501955
16256	MT-TT	0.671553	0.502298
189	MT-TG	-0.669565	0.503563
189	MT-TE	0.668763	0.504074
16192	MT-TW	-0.668263	0.504393
1888	MT-TF	-0.667821	0.504674
5656	MT-TW	-0.665939	0.505875
16362	MT-TT	-0.664351	0.50689
73	MT-TP	-0.663768	0.507262
5656	MT-TM	-0.6609	0.509098
195	MT-TS2	-0.660814	0.509153
189	MT-TP	0.659005	0.510312
7768	MT-TG	-0.657148	0.511505
5460	MT-TL1	0.656489	0.511928
16294	MT-TL2	-0.652044	0.514788
12612	MT-TC	-0.651286	0.515276
16129	MT-TW	0.648352	0.51717
16223	MT-TP	-0.648309	0.517197
5460	MT-TP	-0.644681	0.519543
4917	MT-TE	0.644263	0.519814
462	MT-TC	-0.64285	0.520729
709	MT-TL1	0.641137	0.521841
146	MT-TE	0.639299	0.523034
1811	MT-TW	-0.638883	0.523304
16362	MT-TI	-0.637793	0.524013
13105	MT-TE	-0.63707	0.524483
5460	MT-TS2	-0.636927	0.524576
16519	MT-TA	0.636048	0.525148
16278	MT-TY	-0.635715	0.525365
709	MT-TM	0.635348	0.525604
16278	MT-TC	-0.633972	0.5265
16192	MT-TP	-0.631528	0.528095
2706	MT-TP	-0.630773	0.528588
146	MT-TL2	-0.626586	0.531327
150	MT-TF	0.626383	0.53146
9698	MT-TE	-0.625502	0.532037
8697	MT-TY	-0.62283	0.53379
14905	MT-TY	-0.62283	0.53379
10463	MT-TY	-0.62283	0.53379
15607	MT-TY	0.62283	0.53379
13708	MT-TT	0.622631	0.53392
310	MT-TA	0.621492	0.534668
16270	MT-TL1	0.621126	0.534909
3010	MT-TM	-0.620719	0.535176
16189	MT-TY	0.618913	0.536364
3197	MT-TM	0.618086	0.536908
13617	MT-TM	0.618086	0.536908
11467	MT-TP	-0.616552	0.537919
12372	MT-TP	0.616552	0.537919
14182	MT-TM	0.615172	0.538829
16278	MT-TM	-0.614871	0.539027
9477	MT-TT	-0.610582	0.541861
14182	MT-TR	0.608185	0.543448
8701	MT-TA	-0.607678	0.543783
13708	MT-TM	0.607309	0.544028
295	MT-TC	-0.607195	0.544103
16069	MT-TC	-0.607195	0.544103
16362	MT-TW	0.605106	0.545489
73	MT-TH	-0.605016	0.545548
11467	MT-TS2	-0.603186	0.546764
12372	MT-TS2	0.603186	0.546764
11914	MT-TH	-0.60275	0.547054
11719	MT-TP	0.601791	0.547691
16270	MT-TA	-0.601156	0.548113
3010	MT-TT	0.600936	0.54826
3197	MT-TY	0.599864	0.548973
13617	MT-TY	0.599864	0.548973
16278	MT-TS2	-0.598812	0.549674
13105	MT-TT	0.597251	0.550714
9477	MT-TM	0.5927	0.553753
310	MT-TT	0.591432	0.554601
16172	MT-TI	0.591022	0.554876
1888	MT-TL2	0.590045	0.55553
310	MT-TE	-0.589726	0.555743
5046	MT-TC	-0.589443	0.555933
146	MT-TY	0.588334	0.556676
195	MT-TM	0.586891	0.557644
16189	MT-TI	0.585621	0.558496
8701	MT-TP	-0.58319	0.560129
6221	MT-TM	0.582114	0.560853
10819	MT-TM	-0.581589	0.561207
13105	MT-TY	-0.579928	0.562325
204	MT-TH	0.579503	0.562611
11914	MT-TC	0.579489	0.562621
1811	MT-TA	0.578716	0.563141
146	MT-TW	0.576703	0.564499
5046	MT-TT	-0.576192	0.564845
15784	MT-TM	0.575963	0.564999
9477	MT-TY	0.575796	0.565112
195	MT-TL1	0.575053	0.565613
16519	MT-TM	-0.574814	0.565775
1888	MT-TY	-0.574171	0.56621
16278	MT-TT	-0.573726	0.566511
13105	MT-TF	-0.572861	0.567096
1888	MT-TA	0.571473	0.568035
3197	MT-TL1	-0.571462	0.568042
13617	MT-TL1	-0.571462	0.568042
10398	MT-TP	-0.569988	0.56904
7768	MT-TF	0.569149	0.569609
3197	MT-TS2	0.568831	0.569825
13617	MT-TS2	0.568831	0.569825
16192	MT-TM	-0.566807	0.571198
1888	MT-TT	0.562064	0.574421
13708	MT-TS2	-0.560076	0.575775
16390	MT-TR	-0.559743	0.576002
11467	MT-TM	-0.559394	0.57624
12372	MT-TM	0.559394	0.57624
7768	MT-TM	-0.558513	0.57684
16278	MT-TF	0.557716	0.577384
189	MT-TM	-0.552515	0.580937
11944	MT-TR	-0.550796	0.582114
14766	MT-TI	0.550295	0.582458
16519	MT-TH	-0.549605	0.58293
13368	MT-TM	0.549579	0.582948
310	MT-TL2	-0.548029	0.584011
204	MT-TS2	-0.545005	0.586086
16189	MT-TP	0.544659	0.586324
10398	MT-TM	-0.543335	0.587235
16362	MT-TA	-0.542181	0.588028
10819	MT-TP	-0.540954	0.588873
14182	MT-TH	0.540598	0.589118
709	MT-TE	-0.539659	0.589765
16390	MT-TM	-0.539479	0.589889
16126	MT-TT	0.538413	0.590624
16304	MT-TL2	-0.537893	0.590982
14798	MT-TA	-0.536474	0.591962
1888	MT-TS2	-0.534742	0.593157
14798	MT-TP	0.533571	0.593967
10819	MT-TA	0.53107	0.595697
10819	MT-TE	-0.53103	0.595724
16183	MT-TR	-0.529702	0.596644
12308	MT-TM	-0.528271	0.597636
14798	MT-TM	0.527286	0.598319
13105	MT-TG	0.526914	0.598577
16183	MT-TW	0.526774	0.598674
11914	MT-TI	0.52487	0.599995
16192	MT-TC	-0.524547	0.60022
16172	MT-TA	0.522728	0.601484
14766	MT-TW	0.517047	0.60544
709	MT-TP	-0.516361	0.605918
10819	MT-TL2	0.514517	0.607206
8206	MT-TF	0.514474	0.607235
5460	MT-TW	0.512618	0.608532
10398	MT-TY	0.512429	0.608664
5046	MT-TY	-0.50532	0.613643
16189	MT-TR	0.505061	0.613824
9698	MT-TY	0.504428	0.614268
9055	MT-TL1	0.50436	0.614316
9698	MT-TG	0.50027	0.61719
489	MT-TR	-0.499558	0.617691
5046	MT-TE	-0.497183	0.619363
14766	MT-TP	-0.495121	0.620816
14793	MT-TF	-0.493777	0.621764
12308	MT-TP	-0.493402	0.622029
709	MT-TA	-0.492684	0.622535
5656	MT-TL1	0.49215	0.622912
9055	MT-TT	0.490876	0.623813
4917	MT-TY	0.490672	0.623957
14182	MT-TF	-0.487145	0.626451
16311	MT-TW	0.486577	0.626853
152	MT-TE	-0.485898	0.627335
9055	MT-TW	0.48533	0.627736
12705	MT-TE	0.483436	0.629079
1888	MT-TM	0.482656	0.629632
14182	MT-TL1	-0.480462	0.63119
16311	MT-TI	0.48018	0.63139
9698	MT-TH	-0.47793	0.632989
13368	MT-TF	-0.477487	0.633305
8697	MT-TA	0.477098	0.633581
14905	MT-TA	0.477098	0.633581
15607	MT-TA	-0.477098	0.633581
10463	MT-TA	0.477098	0.633581
10819	MT-TC	-0.474837	0.63519
11719	MT-TT	-0.473462	0.63617
5656	MT-TT	-0.469762	0.638809
4917	MT-TM	-0.467536	0.640398
489	MT-TW	0.466821	0.640909
11944	MT-TL2	0.464334	0.642688
11719	MT-TI	-0.464041	0.642898
709	MT-TI	-0.462877	0.643732
10463	MT-TL2	0.462632	0.643907
8697	MT-TL2	0.462632	0.643907
14905	MT-TL2	0.462632	0.643907
15607	MT-TL2	-0.462632	0.643907
14798	MT-TW	0.461325	0.644843
12705	MT-TH	-0.459199	0.646368
16126	MT-TE	-0.459081	0.646452
10398	MT-TC	-0.458589	0.646805
16223	MT-TH	-0.457246	0.64777
7768	MT-TR	-0.456835	0.648064
1811	MT-TC	0.456803	0.648088
11719	MT-TW	-0.454979	0.649397
9055	MT-TY	0.454716	0.649587
150	MT-TL1	0.453488	0.65047
14798	MT-TL2	0.452463	0.651207
11914	MT-TY	-0.452076	0.651486
16192	MT-TL1	-0.451227	0.652097
15607	MT-TM	-0.448857	0.653804
8697	MT-TM	0.448857	0.653804
14905	MT-TM	0.448857	0.653804
10463	MT-TM	0.448857	0.653804
5656	MT-TP	0.44853	0.65404
5656	MT-TG	-0.447131	0.655048
15928	MT-TA	0.444547	0.656913
16192	MT-TY	-0.444187	0.657173
10398	MT-TL2	-0.44392	0.657366
6221	MT-TT	0.443026	0.658013
14793	MT-TG	-0.442986	0.658041
13105	MT-TR	-0.442961	0.658059
5460	MT-TY	-0.442854	0.658136
12308	MT-TC	-0.440497	0.659841
5046	MT-TS2	-0.44014	0.660099
11914	MT-TM	0.440005	0.660197
15928	MT-TM	0.439746	0.660384
7768	MT-TY	-0.439337	0.66068
8697	MT-TH	0.437	0.662373
10463	MT-TH	0.437	0.662373
14905	MT-TH	0.437	0.662373
15607	MT-TH	-0.437	0.662373
14798	MT-TR	0.435666	0.663339
13368	MT-TI	0.433198	0.66513
150	MT-TP	0.431614	0.666279
12612	MT-TW	-0.426557	0.669956
310	MT-TW	-0.42603	0.67034
16519	MT-TE	0.425431	0.670776
15928	MT-TI	0.42527	0.670893
4216	MT-TA	-0.425242	0.670913
15452	MT-TA	-0.425242	0.670913
11251	MT-TA	0.425242	0.670913
1888	MT-TH	0.424064	0.671772
1888	MT-TI	0.423455	0.672215
13708	MT-TL2	-0.422244	0.673098
4917	MT-TH	-0.420901	0.674078
16278	MT-TE	-0.419876	0.674826
73	MT-TY	-0.418302	0.675975
12308	MT-TS2	-0.417393	0.676639
150	MT-TT	0.414	0.67912
16362	MT-TY	-0.413084	0.679791
11467	MT-TH	-0.410437	0.681729
12372	MT-TH	0.410437	0.681729
16192	MT-TH	-0.409702	0.682268
5046	MT-TL2	-0.409445	0.682456
16278	MT-TH	-0.408779	0.682945
12308	MT-TH	-0.408162	0.683397
15928	MT-TL2	0.40795	0.683552
16362	MT-TM	0.407703	0.683733
16192	MT-TA	-0.405474	0.68537
13590	MT-TY	-0.405323	0.68548
14793	MT-TE	0.405165	0.685596
13368	MT-TE	-0.405061	0.685672
195	MT-TC	0.404916	0.685779
146	MT-TG	-0.404217	0.686293
4917	MT-TI	-0.403225	0.687022
195	MT-TI	-0.402649	0.687445
295	MT-TW	-0.398981	0.690143
16069	MT-TW	-0.398981	0.690143
10398	MT-TR	-0.398856	0.690235
13708	MT-TW	-0.398794	0.690281
14766	MT-TS2	0.397832	0.690989
1811	MT-TE	0.397179	0.691471
11251	MT-TM	-0.396685	0.691834
4216	MT-TM	0.396685	0.691834
15452	MT-TM	0.396685	0.691834
9698	MT-TW	0.396508	0.691965
16256	MT-TW	-0.395799	0.692487
10398	MT-TE	0.395689	0.692568
11914	MT-TW	0.394475	0.693463
15928	MT-TH	0.394194	0.693671
15928	MT-TS2	-0.393908	0.693882
13368	MT-TP	0.391305	0.695803
16311	MT-TL2	0.389019	0.697492
16294	MT-TM	-0.388281	0.698037
15784	MT-TI	0.388258	0.698054
13590	MT-TE	-0.387244	0.698804
1811	MT-TG	-0.385372	0.700188
10463	MT-TS2	-0.385201	0.700315
8697	MT-TS2	-0.385201	0.700315
14905	MT-TS2	-0.385201	0.700315
15607	MT-TS2	0.385201	0.700315
489	MT-TC	0.385196	0.700319
16390	MT-TA	0.381867	0.702785
14793	MT-TW	-0.381219	0.703265
14182	MT-TG	0.380646	0.70369
16126	MT-TM	0.380455	0.703832
16172	MT-TC	0.378089	0.705587
10463	MT-TI	0.377876	0.705745
8697	MT-TI	0.377876	0.705745
14905	MT-TI	0.377876	0.705745
15607	MT-TI	-0.377876	0.705745
16223	MT-TC	-0.377376	0.706116
185	MT-TC	0.375292	0.707664
11467	MT-TC	-0.37505	0.707844
12372	MT-TC	0.37505	0.707844
16223	MT-TE	0.373165	0.709245
150	MT-TM	-0.372712	0.709582
9055	MT-TE	-0.372625	0.709646
189	MT-TY	0.370824	0.710986
13590	MT-TH	-0.365939	0.714625
5046	MT-TG	0.365529	0.714931
16362	MT-TH	0.36446	0.715728
5460	MT-TL2	0.364431	0.71575
16189	MT-TE	-0.362236	0.717387
185	MT-TA	-0.36185	0.717676
13105	MT-TP	-0.361622	0.717846
16311	MT-TS2	-0.358128	0.720457
5656	MT-TS2	0.356246	0.721864
14798	MT-TI	-0.354958	0.722828
8701	MT-TT	-0.353923	0.723603
5656	MT-TA	0.350386	0.726254
13105	MT-TL2	0.350063	0.726496
5656	MT-TF	0.349476	0.726936
146	MT-TH	-0.348016	0.728031
4917	MT-TL2	-0.347615	0.728332
2706	MT-TL1	0.344463	0.730699
73	MT-TT	0.343468	0.731446
204	MT-TP	0.343442	0.731466
16294	MT-TE	0.342313	0.732314
11944	MT-TL1	0.341543	0.732893
5046	MT-TM	0.341412	0.732992
2617	MT-TT	-0.340845	0.733419
195	MT-TT	0.337686	0.735796
5460	MT-TF	-0.337452	0.735973
7028	MT-TH	-0.337436	0.735984
14793	MT-TY	-0.332212	0.739922
150	MT-TY	-0.329132	0.742247
16304	MT-TC	-0.327515	0.743468
13708	MT-TP	0.325865	0.744715
12612	MT-TL2	0.323597	0.746431
16172	MT-TR	0.323078	0.746823
16183	MT-TT	-0.3222	0.747488
8701	MT-TY	-0.320836	0.748521
14798	MT-TC	0.318849	0.750026
16294	MT-TY	0.318473	0.750311
16129	MT-TS2	0.318205	0.750514
5656	MT-TH	-0.317671	0.750918
16172	MT-TM	0.314374	0.753419
146	MT-TA	-0.313805	0.753851
16519	MT-TC	0.312899	0.754538
14798	MT-TE	0.311206	0.755824
12705	MT-TC	-0.311172	0.755849
13590	MT-TR	0.309298	0.757273
10819	MT-TI	0.308882	0.75759
73	MT-TA	0.307586	0.758575
16362	MT-TE	0.307512	0.758631
462	MT-TE	-0.305807	0.759928
13368	MT-TG	0.304451	0.76096
13708	MT-TE	-0.300522	0.763952
4917	MT-TS2	0.294719	0.768378
462	MT-TW	-0.294068	0.768875
9540	MT-TT	0.293879	0.769019
10873	MT-TT	0.293879	0.769019
15301	MT-TT	0.293879	0.769019
152	MT-TT	-0.293505	0.769305
13708	MT-TY	-0.292252	0.770262
8206	MT-TP	-0.291295	0.770993
7768	MT-TH	-0.290438	0.771648
1811	MT-TS2	0.289786	0.772146
13368	MT-TY	-0.283649	0.776842
16129	MT-TC	0.279204	0.780248
10398	MT-TS2	0.276394	0.782403
1811	MT-TL1	0.275401	0.783166
8206	MT-TA	-0.274001	0.78424
11914	MT-TG	-0.27292	0.785071
11719	MT-TH	0.270242	0.787128
185	MT-TE	0.26793	0.788906
185	MT-TW	0.267475	0.789256
7028	MT-TY	-0.265919	0.790453
9055	MT-TC	0.265753	0.790581
16172	MT-TS2	0.264623	0.791451
7028	MT-TW	0.264518	0.791531
6221	MT-TR	0.260392	0.79471
16223	MT-TL2	0.254079	0.79958
13368	MT-TS2	-0.254009	0.799633
3197	MT-TA	0.253373	0.800124
13617	MT-TA	0.253373	0.800124
1888	MT-TP	0.250724	0.80217
13368	MT-TA	0.249552	0.803076
73	MT-TI	0.248465	0.803916
16223	MT-TM	-0.2483	0.804043
2706	MT-TY	-0.246906	0.805121
8206	MT-TR	-0.24658	0.805373
146	MT-TF	-0.246507	0.80543
709	MT-TH	0.245777	0.805994
16278	MT-TG	-0.245282	0.806377
16362	MT-TL1	0.244275	0.807156
16189	MT-TS2	0.244143	0.807259
189	MT-TC	0.243262	0.80794
3010	MT-TG	0.242494	0.808535
16172	MT-TY	0.241321	0.809443
9055	MT-TA	0.241279	0.809476
9540	MT-TH	-0.241122	0.809597
10873	MT-TH	-0.241122	0.809597
15301	MT-TH	-0.241122	0.809597
2706	MT-TW	0.238074	0.811959
2617	MT-TI	-0.236529	0.813156
13105	MT-TH	-0.233612	0.815419
11719	MT-TY	0.233531	0.815481
2706	MT-TH	-0.232937	0.815942
16390	MT-TW	0.23261	0.816196
709	MT-TT	0.23103	0.817422
16270	MT-TP	0.230769	0.817625
11251	MT-TL2	-0.228677	0.81925
4216	MT-TL2	0.228677	0.81925
15452	MT-TL2	0.228677	0.81925
15784	MT-TC	0.228623	0.819291
13590	MT-TP	0.223109	0.823577
15928	MT-TG	-0.222901	0.823738
4917	MT-TA	-0.222845	0.823782
16362	MT-TP	0.222552	0.82401
14793	MT-TM	-0.220451	0.825645
16270	MT-TT	-0.219877	0.826091
16256	MT-TY	-0.219001	0.826773
7768	MT-TP	0.21575	0.829304
709	MT-TL2	-0.214874	0.829987
14793	MT-TL1	0.213372	0.831157
310	MT-TI	-0.212084	0.832161
16390	MT-TE	-0.210961	0.833037
13590	MT-TL2	0.208312	0.835103
16294	MT-TS2	-0.208074	0.835288
13590	MT-TG	-0.206393	0.8366
16126	MT-TL2	0.205625	0.8372
709	MT-TG	0.205487	0.837307
462	MT-TL2	-0.204959	0.83772
9698	MT-TT	-0.20495	0.837727
189	MT-TH	-0.202577	0.83958
8701	MT-TW	-0.193347	0.846796
15301	MT-TI	0.191523	0.848223
9540	MT-TI	0.191523	0.848223
10873	MT-TI	0.191523	0.848223
3010	MT-TI	0.19145	0.848281
9540	MT-TL1	-0.19118	0.848492
10873	MT-TL1	-0.19118	0.848492
15301	MT-TL1	-0.19118	0.848492
1811	MT-TM	-0.184425	0.853783
13105	MT-TL1	0.182507	0.855287
9477	MT-TA	0.181351	0.856194
8206	MT-TC	0.180209	0.85709
152	MT-TC	0.179969	0.857278
16519	MT-TF	0.178906	0.858112
16294	MT-TF	-0.175304	0.860939
16278	MT-TL2	0.174604	0.861489
16256	MT-TR	-0.174313	0.861717
189	MT-TT	0.173969	0.861988
16256	MT-TC	-0.17385	0.862081
15301	MT-TF	0.171989	0.863542
9540	MT-TF	0.171989	0.863542
10873	MT-TF	0.171989	0.863542
189	MT-TS2	-0.17195	0.863573
462	MT-TT	-0.171625	0.863829
15301	MT-TM	-0.171333	0.864058
9540	MT-TM	-0.171333	0.864058
10873	MT-TM	-0.171333	0.864058
8701	MT-TE	0.17068	0.864571
16519	MT-TT	-0.169366	0.865604
16183	MT-TP	0.16617	0.868116
152	MT-TR	-0.162603	0.870922
16183	MT-TI	-0.161629	0.871689
16183	MT-TM	-0.161095	0.872108
8206	MT-TM	0.159686	0.873218
5046	MT-TH	-0.159678	0.873224
16256	MT-TM	0.15922	0.873585
12705	MT-TS2	0.15744	0.874986
14182	MT-TS2	-0.155966	0.876147
15784	MT-TY	-0.155445	0.876557
16294	MT-TG	0.154703	0.877142
16256	MT-TP	-0.154242	0.877505
10819	MT-TW	-0.154087	0.877627
9540	MT-TE	0.152859	0.878595
10873	MT-TE	0.152859	0.878595
15301	MT-TE	0.152859	0.878595
3197	MT-TI	0.151622	0.879569
13617	MT-TI	0.151622	0.879569
16294	MT-TP	0.14739	0.882906
13105	MT-TW	-0.146053	0.883961
13708	MT-TR	-0.144132	0.885476
295	MT-TL2	0.143857	0.885694
16069	MT-TL2	0.143857	0.885694
15301	MT-TG	0.143158	0.886245
9540	MT-TG	0.143158	0.886245
10873	MT-TG	0.143158	0.886245
9698	MT-TA	0.14311	0.886283
16278	MT-TR	0.142573	0.886707
12308	MT-TF	-0.141779	0.887334
6221	MT-TE	0.140241	0.888548
11719	MT-TS2	-0.137039	0.891077
5656	MT-TR	-0.136344	0.891626
150	MT-TR	-0.13451	0.893074
9477	MT-TP	-0.132356	0.894777
12612	MT-TM	-0.131413	0.895522
8701	MT-TL1	-0.130012	0.89663
5460	MT-TM	0.128686	0.897678
2617	MT-TA	0.128604	0.897743
11944	MT-TI	0.128534	0.897798
10463	MT-TG	-0.128151	0.898101
15607	MT-TG	0.128151	0.898101
8697	MT-TG	-0.128151	0.898101
14905	MT-TG	-0.128151	0.898101
10819	MT-TF	0.126021	0.899786
11914	MT-TF	-0.125164	0.900463
11944	MT-TW	0.124297	0.901149
11467	MT-TF	-0.12068	0.904012
12372	MT-TF	0.12068	0.904012
9055	MT-TS2	0.120293	0.904318
16362	MT-TS2	-0.119418	0.90501
8206	MT-TY	0.118357	0.905851
16519	MT-TW	0.118259	0.905928
9698	MT-TC	0.11808	0.90607
15301	MT-TS2	0.117193	0.906773
9540	MT-TS2	0.117193	0.906773
10873	MT-TS2	0.117193	0.906773
16270	MT-TF	-0.116437	0.907371
4917	MT-TG	0.115898	0.907798
9477	MT-TI	0.115351	0.908231
10819	MT-TR	0.114097	0.909224
6221	MT-TS2	-0.112608	0.910404
5460	MT-TG	0.109813	0.912619
16294	MT-TH	-0.109521	0.91285
14766	MT-TY	-0.109	0.913263
9477	MT-TF	-0.108429	0.913715
16223	MT-TS2	0.104945	0.916478
16189	MT-TA	0.104215	0.917057
295	MT-TT	-0.103331	0.917758
16069	MT-TT	-0.103331	0.917758
10398	MT-TF	-0.10154	0.919179
8701	MT-TH	0.100659	0.919877
9540	MT-TL2	0.100376	0.920102
10873	MT-TL2	0.100376	0.920102
15301	MT-TL2	0.100376	0.920102
462	MT-TA	0.0980237	0.921968
16192	MT-TF	0.0966227	0.92308
185	MT-TT	0.0943814	0.924859
295	MT-TM	-0.0933151	0.925705
16069	MT-TM	-0.0933151	0.925705
14182	MT-TT	-0.0913932	0.927231
7768	MT-TS2	0.0893272	0.928871
16311	MT-TC	-0.0889807	0.929147
146	MT-TL1	-0.0889222	0.929193
15301	MT-TC	0.0883068	0.929682
9540	MT-TC	0.0883068	0.929682
10873	MT-TC	0.0883068	0.929682
9698	MT-TS2	-0.0858748	0.931614
146	MT-TT	0.084374	0.932806
489	MT-TT	0.0817179	0.934916
16172	MT-TW	-0.0809523	0.935525
11914	MT-TL1	-0.0809287	0.935543
73	MT-TS2	0.0778831	0.937964
12612	MT-TT	-0.0772376	0.938477
15301	MT-TW	0.0746889	0.940504
9540	MT-TW	0.0746889	0.940504
10873	MT-TW	0.0746889	0.940504
185	MT-TM	0.074187	0.940903
8206	MT-TI	-0.073442	0.941495
5046	MT-TL1	0.072743	0.942051
16304	MT-TE	0.0724798	0.94226
9055	MT-TH	0.072461	0.942275
1811	MT-TF	-0.0722442	0.942448
462	MT-TM	0.0719817	0.942656
189	MT-TL2	-0.0714261	0.943098
150	MT-TH	-0.0712162	0.943265
15784	MT-TW	-0.0707132	0.943665
204	MT-TL2	0.0679476	0.945865
6221	MT-TH	0.0678958	0.945906
9698	MT-TL2	0.0656047	0.947729
15928	MT-TP	-0.065213	0.948041
3197	MT-TP	0.0633488	0.949524
13617	MT-TP	0.0633488	0.949524
489	MT-TM	0.0631168	0.949708
16256	MT-TL1	-0.0565545	0.954931
16126	MT-TA	-0.0563362	0.955105
12308	MT-TA	0.0553449	0.955894
4917	MT-TP	-0.0551841	0.956022
14793	MT-TP	-0.0548754	0.956268
14182	MT-TP	0.0530709	0.957705
16390	MT-TT	-0.0509831	0.959367
5460	MT-TH	-0.0499888	0.960159
489	MT-TL2	0.0487934	0.961111
185	MT-TL2	0.0485788	0.961282
9540	MT-TY	-0.0477886	0.961911
10873	MT-TY	-0.0477886	0.961911
15301	MT-TY	-0.0477886	0.961911
13590	MT-TW	-0.0443306	0.964665
16311	MT-TE	-0.0438624	0.965038
16129	MT-TE	-0.0428446	0.965849
3010	MT-TS2	-0.042788	0.965894
14798	MT-TT	-0.042765	0.965912
11944	MT-TY	0.0391956	0.968756
16311	MT-TA	-0.0371598	0.970378
14766	MT-TH	-0.0352236	0.971921
16192	MT-TI	0.0342121	0.972727
189	MT-TW	0.0339166	0.972962
15301	MT-TR	0.0316949	0.974733
9540	MT-TR	0.0316949	0.974733
10873	MT-TR	0.0316949	0.974733
146	MT-TS2	0.0307189	0.975511
8701	MT-TM	0.0296268	0.976381
9540	MT-TP	-0.0291255	0.976781
10873	MT-TP	-0.0291255	0.976781
15301	MT-TP	-0.0291255	0.976781
12705	MT-TL2	-0.0288822	0.976975
16270	MT-TM	-0.0268506	0.978594
16519	MT-TS2	0.025894	0.979356
15301	MT-TA	0.0255148	0.979658
9540	MT-TA	0.0255148	0.979658
10873	MT-TA	0.0255148	0.979658
3197	MT-TF	0.0254458	0.979713
13617	MT-TF	0.0254458	0.979713
13105	MT-TM	0.0251412	0.979956
8701	MT-TF	0.0245747	0.980408
13590	MT-TM	-0.0240676	0.980812
13590	MT-TF	-0.0220356	0.982432
11944	MT-TM	-0.0218922	0.982546
16189	MT-TM	-0.0218895	0.982548
1888	MT-TG	0.0208212	0.9834
10463	MT-TP	-0.020238	0.983865
15607	MT-TP	0.020238	0.983865
8697	MT-TP	-0.020238	0.983865
14905	MT-TP	-0.020238	0.983865
6221	MT-TL2	-0.0194228	0.984515
152	MT-TS2	-0.018839	0.98498
204	MT-TC	-0.0185055	0.985246
8206	MT-TT	-0.0180093	0.985641
12372	MT-TA	-0.0178766	0.985747
11467	MT-TA	0.0178766	0.985747
16390	MT-TH	0.0150828	0.987974
14793	MT-TC	-0.0137052	0.989073
195	MT-TE	-0.0117914	0.990599
8701	MT-TC	-0.0112045	0.991066
10819	MT-TT	0.00949429	0.99243
5460	MT-TC	-0.00792586	0.993681
5656	MT-TY	0.00625956	0.995009
11914	MT-TL2	-0.00570832	0.995449
204	MT-TE	0.00434807	0.996533
5046	MT-TW	-0.00325949	0.997401
16311	MT-TG	0.00308372	0.997541
16172	MT-TP	-0.00231876	0.998151
7768	MT-TT	-0.000824103	0.999343
